# Supplementary material
Source: publisher site journal article supplement (https://www.spandidos-publications.com/3553/downloadSupplementary)

Figure S1. miR-486-5p expression was determined in AGS and HGC27 cells transfected with Ctrl inhibitor and miR-486-5p inhibitor using reverse transcription-quantitative PCR. miR, microRNA; Ctrl, control.

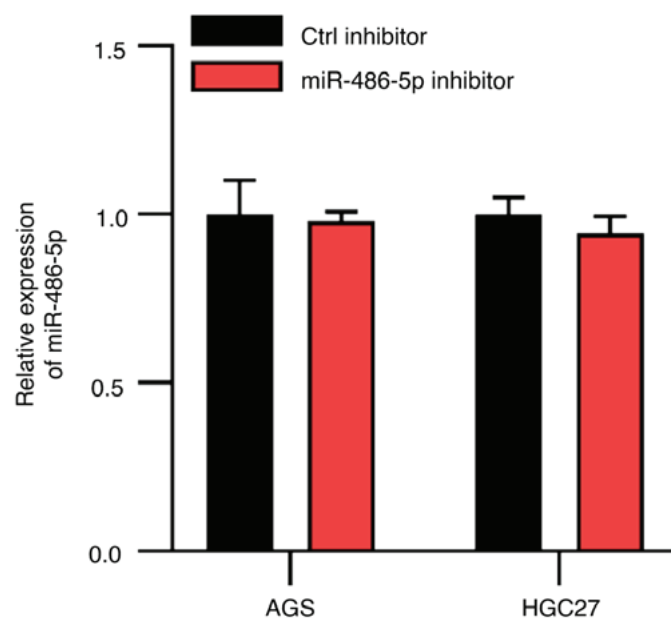

Figure S2. The FGF9 protein level was determined in AGS and HGC27 cells with Ctrl and FGF9 overexpression using Western blot assay. FGF9, fibroblast growth factor 9; Ctrl, control.

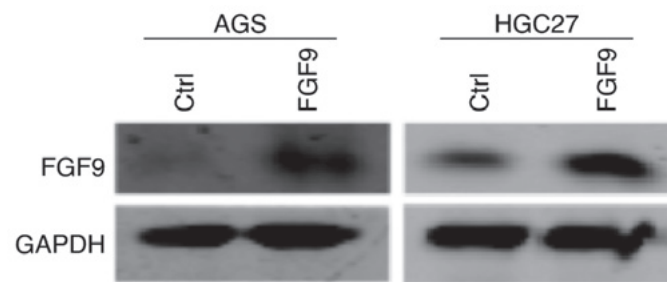

Supplement: Supplementary file 1 [file downloadSupplementary]
